# Supplementary material for: FoxO transcription factors are required for hepatic HDL cholesterol clearance
Source: JCI journal article supplement (doi:10.1172/jci94230), 2018-02-06
Supplement: sd1 [file 1]

## Supplemental Figure Legends

### Figure S1. Western Blot of Total Plasma apoA-I. Related to Figure 1

(A-B) Plasma was collected from (A) chow-fed and (B) WTD-fed L-FoxO1,3,4 mice and littermate controls. Plasma was diluted by 1:200 with PBS, from which 20 $\mu$ l from each sample were run on a 4%-15% Tris-HCL gradient gel and blotted for apoA-I. Numbers denote relative apoA-I expression levels by densitometric scanning (n=4-7). Values are presented as mean  $\pm$  SEM. Shown is a typical experiment. Independent experiments yielded qualitatively identical results.

### Figure S2. Western Blot of Liver ABCA1 and SR-BI from Chow-Fed and WTD-Fed L-FoxO1,3,4 Mice. Related to Figure 2

Representative western blot of hepatic ABCA1 and SR-BI expression in both chow-fed and WTD-fed L-FoxO1,3,4 mice and littermate controls. ABCA1/Actin and SR-BI/Actin denote relative ABCA1 and SR-BI expression levels by densitometric scanning, respectively (n=4). ABCA1 antibody was commercially purchased from Novus (Novus – NB400-105). Data are presented as mean  $\pm$  SEM.

### Figure S3. Plasma Decay Kinetics of $^{125}$ I-TC-/ $^3$ H]Cet-WT-HDL in WTD-Fed L-FoxO1,3,4 Mice. Related to Figure 3

(A-B)  $^{125}$ I-TC-/ $^3$ H]Cet-WT-HDL was injected intravenously in WTD-fed L-FoxO1,3,4 mice and littermate controls. Thereafter, during a 24-hr interval, periodic blood samples were harvested and plasma was analyzed for  $^{125}$ I-TC (crosses) and  $^3$ H]Cet (circles). The y-axis represents the fraction of the tracer in plasma (%). Shown is a trace from a representative mouse from each genotype, with (A) control on the left and (B) L-FoxO1,3,4 on the right. The experiment was carried out in 6 control and 5 L-FoxO1,3,4 mice.

### Figure S4. Plasma-FCRs and Tissue Tracer Uptake Rates for $^{125}$ I-TC-/ $^3$ H]Cet-WT-HDL in WTD-Fed L-FoxO1,3,4 Mice. Related to Figure 4

$^{125}$ I-TC-/ $^3$ H]Cet-WT-HDL was injected intravenously in WTD-fed L-FoxO1,3,4 mice and littermate controls. (A) During the subsequent 24-hr interval, blood was harvested periodically to determine the plasma decay of both tracers.  $^{125}$ I-TC ( $^{125}$ I) and  $^3$ H]Cet ( $^3$ H]) were analyzed, and plasma-FCRs for  $^{125}$ I-TC and  $^3$ H]Cet were calculated. The difference in plasma-FCRs between  $^3$ H]Cet and  $^{125}$ I-TC was calculated. 24-hrs after tracer injection, the animals were euthanized, and tissues were analyzed for both tracers. (B) Liver, (C) adrenal and (D) kidney organ-FCRs for  $^{125}$ I-TC ( $^{125}$ I),  $^3$ H]Cet ( $^3$ H]), and the difference in organ-FCRs between  $^3$ H]Cet and  $^{125}$ I-TC ( $^3$ H]Cet -  $^{125}$ I-TC) were calculated. All calculations were done as described in Materials and Methods. n = 6 control and n = 5 L-FoxO1,3,4 mice. An independent similar experiment with n=5 control mice and n=4 L-FoxO1,3,4 mice yielded qualitatively identical results as shown in the graphs. \*p < 0.05, \*\*p < 0.01, by Student's t-tests. Data are presented as mean  $\pm$  SEM.

### Figure S5. Adrenal Gene Expression in Chow-Fed L-FoxO1,3,4 Mice. Related to Figure 4

Relative adrenal *Scarb1* and *Foxo1* gene expression by qPCR in chow-fed L-FoxO1,3,4 mice (n=3) and littermate controls (n=3). Data are presented as mean  $\pm$  SEM.

### Figure S6. Kinetics of Uptake of $^{125}$ I-TC-/ $^3$ H]Cet-WT-HDL by Hepatocytes Isolated from Chow-Fed L-FoxO1,3,4 Mice. Related to Figure 5

(A-B) Hepatocytes from chow-fed L-FoxO1,3,4 mice and littermate controls were incubated (37°C, 10, 30 or 120 minutes) in medium containing  $^{125}$ I-TC-/ $^3$ H]Cet-WT-HDL (20  $\mu$ g HDL protein/ml). Finally, cells were harvested, and apparent HDL particle uptake was analyzed as outlined in Materials and Methods. Values are means of (A) n = 3 (control) or of (B) n = 3 (L-FoxO1,3,4) independent determinations. Shown is a typical experiment. An independent similar experiment yielded qualitatively identical results. §§ p < 0.01, §§§ p < 0.001 comparing  $^3$ H]Cet between L-FoxO1,3,4 and control hepatocytes; \*\* p < 0.01, \*\*\* p < 0.001, \*\*\*\* p < 0.0001 comparing  $^3$ H]Cet -  $^{125}$ I-TC between L-FoxO1,3,4 and control hepatocytes by Student's t-tests. Data are presented as mean  $\pm$  SEM. Where no error bars are visible, the error was smaller than the symbol.

**Figure S7. Effect of SR-BI Adenovirus on HL in WTD-fed L-FoxO1,3,4 Mice. Related to Figure 6**

(A) Relative hepatic *Lipc* expression by qPCR in WTD-fed L-FoxO1,3,4 mice and littermate controls transduced with Adeno.SR-BI or control virus (Adeno.GFP). (n=3-4). \*\*p<0.01 by two-way ANOVA. (B) Relative Plasma hepatic lipase activity in same mice as (A). \*\*p<0.01 by two-way ANOVA.

**Figure S8. Potential FoxO Binding Site Analysis of *Scarb1* and *Lipc* Using HOMER Motif Discovery Algorithm.**

(A) Summary of potential FoxO binding motifs near *Scarb1* and *Lipc*. The entire sequences for mouse *Scarb1* and *Lipc*, along with 50kb of sequence upstream of their respective transcription start sites were taken from the UCSC Genome Browser (<https://genome.ucsc.edu>). The sequences were analyzed by the HOMER algorithm software, which provided the coordinates of all the potential FoxO binding motifs within the selected regions. Values are grouped by motifs within the gene sequence, motifs from the transcription start site to 5kb upstream of start site, 5kb-20kb upstream of start site, 20kb-50kb upstream of start site, and total number of motifs.

(B-C) Schematics from the UCSC Genome Browser highlighting positions of all motifs in selected region for (B) *Scarb1* and (C) *Lipc*. Highlighted in yellow are the relative coordinates of all potential FoxO binding motifs found though HOMER. Each motif is represented as a vertical line (“|”). Transcription start sites are indicated by the red arrow (both genes are transcribed in the reverse direction).

**Figure S9. Cholesterol Levels in Plasma Fractionated by FPLC in Chow-fed Hepatic FoxO Floxed Mice Transduced with Liver Specific Adeno-Associated Virus Expressing Cre. Related to Figure 7**

Plasma was collected 2 weeks after virus transduction and fractionated by FPLC in chow-fed, adult control mice containing all three FoxO alleles floxed (*Foxo1*<sup>flox/flox</sup>, *Foxo3*<sup>flox/flox</sup>, and *Foxo4*<sup>flox/Y</sup>), and transduced with liver specific adeno-associated virus expressing either Cre (AAV8.Tbg.Cre) or control virus (AAV.GFP).

**Figure S10. Western Blot of Liver PDZK1 from WTD-Fed L-FoxO1,3,4 Mice and Hepatocytes Isolated from L-FoxO1,3,4 mice. Related to Figure 7**

(A-B) Representative western blot of hepatic PDZK1 expression from (A) WTD-fed L-FoxO1,3,4 mice and littermate controls *in vivo*, or (B) hepatocytes isolated from chow-fed L-FoxO1,3,4 mice and littermate controls *in vitro*. PDZK1 antibody was commercially purchased from Novus (Novus – NB400-149).

**Table S1. L-FoxO1,3,4 Microarray From Liver Tissues.** Microarrays were performed from liver tissues of chow-fed L-FoxO1,3,4 mice and littermate controls (Haeusler et al., 2014).

| Gene                 | Control  | L-FoxO1,3,4  | P value        |
|----------------------|----------|--------------|----------------|
| <b><i>Scarb1</i></b> | <b>1</b> | <b>0.727</b> | <b>0.043</b>   |
| <b><i>Lipc</i></b>   | <b>1</b> | <b>0.364</b> | <b>0.00091</b> |
| <i>Abca1</i>         | 1        | 1.132        | 0.27           |
| <i>Apoa1</i>         | 1        | 0.950        | 0.17           |
| <i>Apoa2</i>         | 1        | 0.96         | 0.56           |
| <i>Apoc3</i>         | 1        | 0.86         | 0.28           |
| <i>ApoE</i>          | 1        | 0.951        | 0.25           |
| <i>Lcat</i>          | 1        | 1.021        | 0.86           |
| <i>Srebp2</i>        | 1        | 0.80         | 0.47           |
| <i>Hmgcr</i>         | 1        | 0.473        | 0.22           |
| <i>Pltp</i>          | 1        | 1.89         | 0.11           |
| <i>Abcg5</i>         | 1        | 0.928        | 0.76           |
| <i>Abcg8</i>         | 1        | 0.825        | 0.532          |

### Supplemental Experimental Procedures

**Primer Sequences.** Primer sequences for genes that were measured via qPCR. For liver and adrenal tissues, genes were normalized to *36b4*. For primary hepatocytes, genes were normalized to *B2m*.

| Gene          | Direction | Sequence (5'-3')                |
|---------------|-----------|---------------------------------|
| <i>36b4</i>   | Forward   | AGATGCAGCAGATCCGCAT             |
| <i>36b4</i>   | Reverse   | GTTCTTGCCCATCAGCACC             |
| <i>B2m</i>    | Forward   | CTGGTGCTTGTCTCACTGAC            |
| <i>B2m</i>    | Reverse   | G TTCAGTATGTTTCGGCTTCC          |
| <i>Abca1</i>  | Forward   | GGTTTGGAGATGGTTATACAATAGTTGT    |
| <i>Abca1</i>  | Reverse   | CCCGGAAACGCAAGTCC               |
| <i>Abcg5</i>  | Forward   | TGGATCCAACACCTCTATGCTAAA        |
| <i>Abcg5</i>  | Reverse   | GGCAGGTTTTCTCGATGAACTG          |
| <i>Abcg8</i>  | Forward   | G TAGCTGATGCCGATGACAA           |
| <i>Abcg8</i>  | Reverse   | GGGGCTGATGCAGATTCA              |
| <i>Apoa1</i>  | Forward   | TGTGTATGTGGATGCGGTCA            |
| <i>Apoa1</i>  | Reverse   | ATCCCAGAAGTCCCAGTCA             |
| <i>Apoc3</i>  | Forward   | GCATCTGCCCGAGCTGAAGAG           |
| <i>Apoc3</i>  | Reverse   | CTGAAGTGATTGTCCATCCAGC          |
| <i>ApoE</i>   | Forward   | CCGGTGCTGTTGGTCACATTGCTGACAGGAT |
| <i>ApoE</i>   | Reverse   | GTTCTTGTGTGACTTGGGAGCTCTGCAGCT  |
| <i>Foxo1</i>  | Forward   | TCCAGTTCCTTCATTCTGCACT          |
| <i>Foxo1</i>  | Reverse   | GCGTGCCCTACTTCAAGGATAA          |
| <i>G6pc</i>   | Forward   | GTCTGGATTCTACCTGCTAC            |
| <i>G6pc</i>   | Reverse   | AAAGACTTCTTGTGTGTCTGTC          |
| <i>Gck</i>    | Forward   | CTGTTAGCAGGATGGCAGCTT           |
| <i>Gck</i>    | Reverse   | TTTCCTGGAGAGATGCTGTGG           |
| <i>Hmgcr</i>  | Forward   | CTTGTGGAATGCCTTGTGATTG          |
| <i>Hmgcr</i>  | Reverse   | AGCCGAAGCAGCACATGAT             |
| <i>Lcat</i>   | Forward   | GCTGGCCTGGTAGAGGAGATG           |
| <i>Lcat</i>   | Reverse   | CCAAGGCTATGCCCAATGA             |
| <i>LipC</i>   | Forward   | GACGGGAAGAACAAGATTGG            |
| <i>lipc</i>   | Reverse   | GGCATCATCAGGAGAAAGG             |
| <i>Pltp</i>   | Forward   | TGGGACGGTGTGCTCAA               |
| <i>Pltp</i>   | Reverse   | CCCACGAGATCATCCACAGA            |
| <i>Scarb1</i> | Forward   | GGCTGCTGTTTGCTGCG               |
| <i>Scarb1</i> | Reverse   | GCTGCTTGATGAGGGAGGG             |
| <i>Srebp2</i> | Forward   | GATGATCACCCCGACGTT CAG          |
| <i>Srebp2</i> | Reverse   | GTACCGTCTGCACCTGCTGCT           |

## Supplemental Figure S1

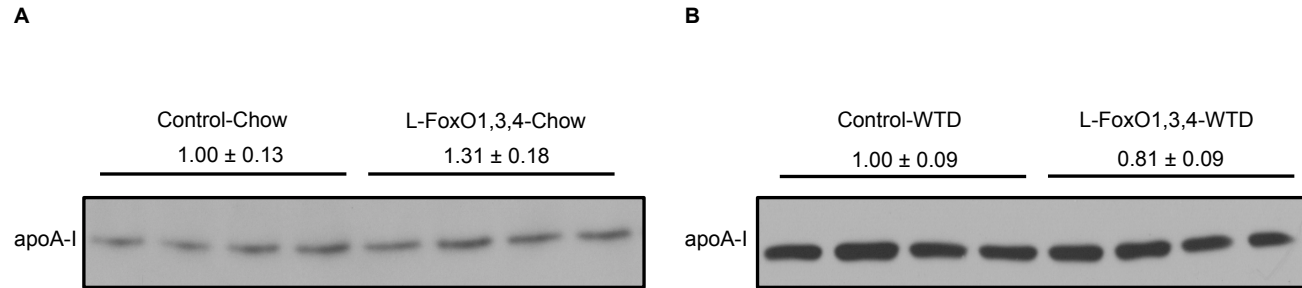

**Figure S1. Western Blot of Total Plasma apoA-I. Related to Figure 1**

(A-B) Plasma was collected from (A) chow-fed and (B) WTD-fed L-FoxO1,3,4 mice and littermate controls. Plasma was diluted by 1:200 with PBS, from which 20µl from each sample were run on a 4%-15% Tris-HCL gradient gel and blotted for apoA-I. Numbers denote relative apoA-I expression levels by densitometric scanning (n=4-7). Values are presented as mean ± SEM. Shown is a typical experiment. Independent experiments yielded qualitatively identical results.

## Supplemental Figure S2

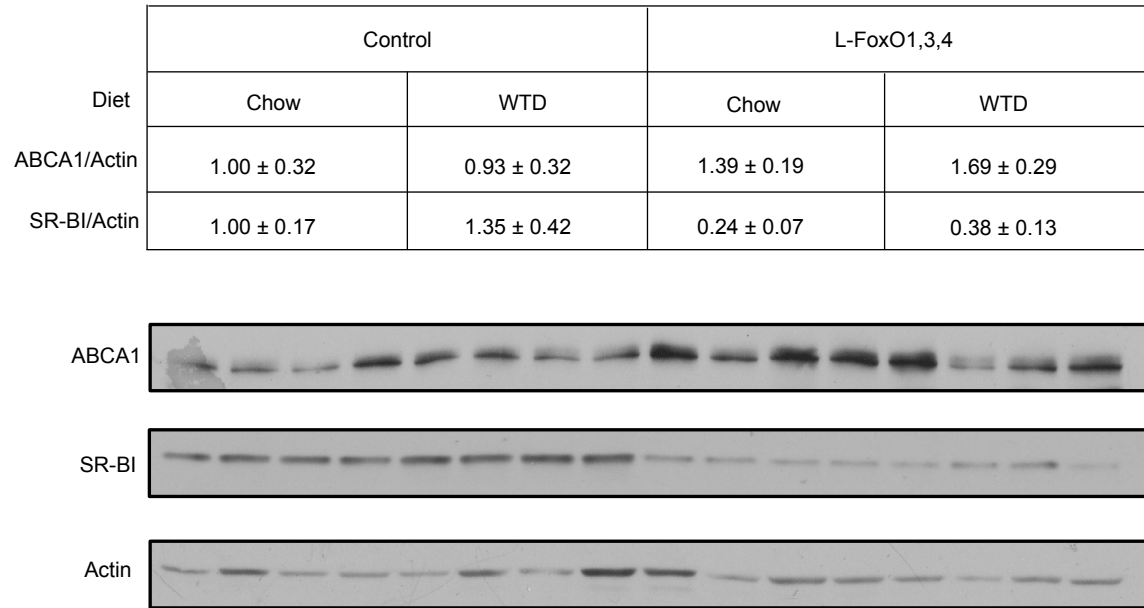

**Figure S2. Western Blot of Liver ABCA1 and SR-BI from Chow-Fed and WTD-Fed L-FoxO1,3,4 Mice. Related to Figure 2**

Representative western blot of hepatic ABCA1 and SR-BI expression in both chow-fed and WTD-fed L-FoxO1,3,4 mice and littermate controls. ABCA1/Actin and SR-BI/Actin denote relative ABCA1 and SR-BI expression levels by densitometric scanning, respectively (n=4). ABCA1 antibody was commercially purchased from Novus (Novus – NB400-105). Data are presented as mean ± SEM.

## Supplemental Figure S3

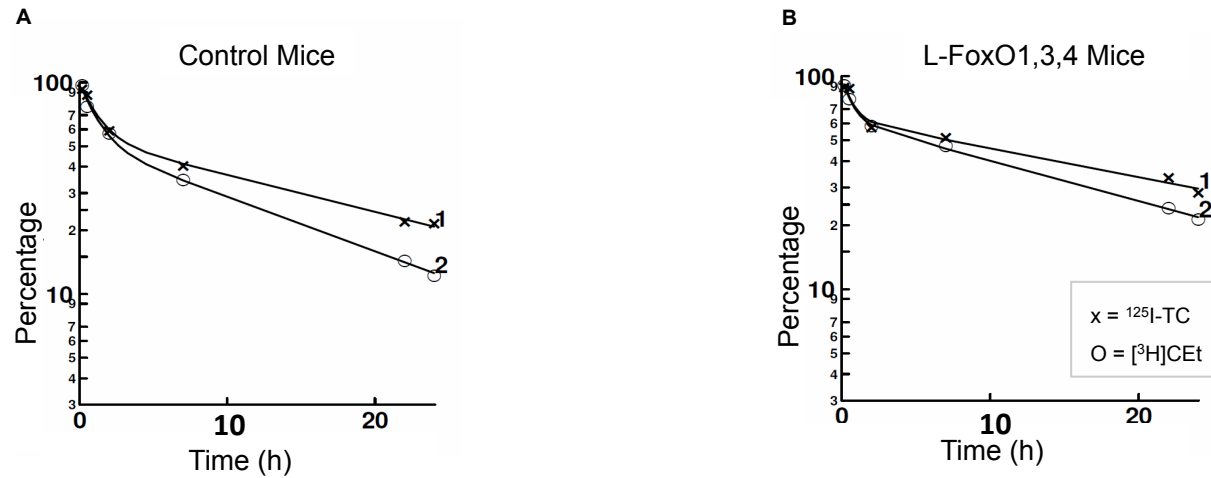

**Figure S3. Plasma Decay Kinetics of  $^{125}\text{I-TC}$ -/ $[^3\text{H]CEt}$ -WT-HDL in WTD-Fed L-FoxO1,3,4 Mice. Related to Figure 3**

(A-B)  $^{125}\text{I-TC}$ -/ $[^3\text{H]CEt}$ -WT-HDL was injected intravenously in WTD-fed L-FoxO1,3,4 mice and littermate controls. Thereafter, during a 24-hr interval, periodic blood samples were harvested and plasma was analyzed for  $^{125}\text{I-TC}$  (crosses) and  $[^3\text{H]CEt}$  (circles). The y-axis represents the fraction of the tracer in plasma (%). Shown is a trace from a representative mouse from each genotype, with (A) control on the left and (B) L-FoxO1,3,4 on the right. The experiment was carried out in 6 control and 5 L-FoxO1,3,4 mice.

# Supplemental Figure S4

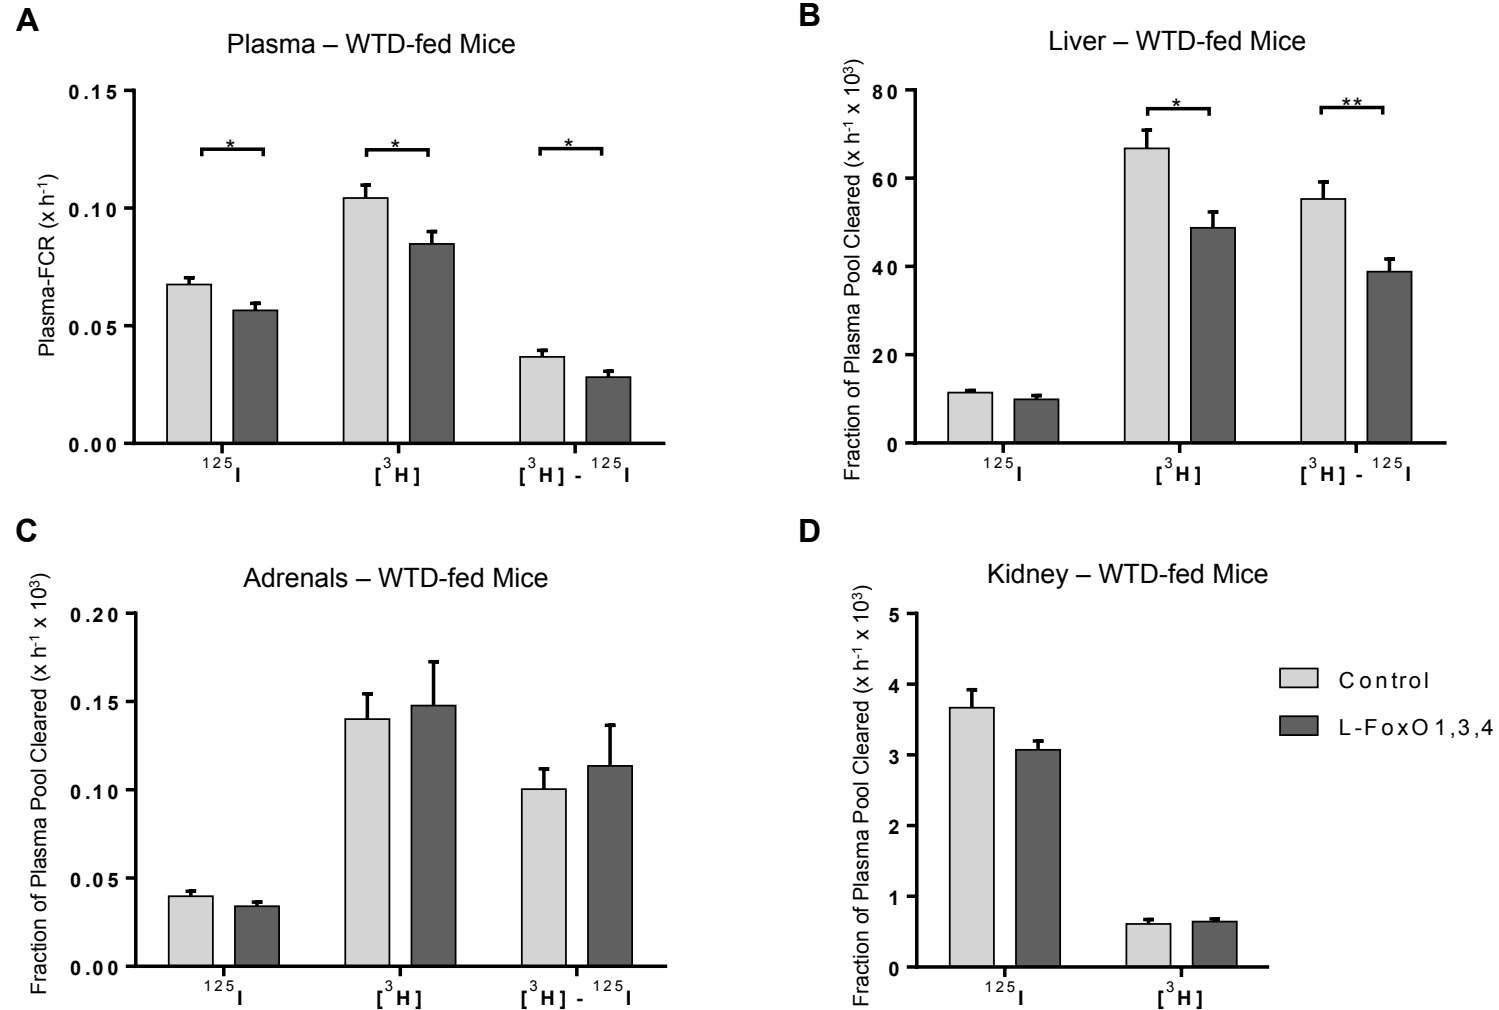

**Figure S4. Plasma-FCRs and Tissue Tracer Uptake Rates for <sup>125</sup>I-TC-/ [<sup>3</sup>H]Cet-WT-HDL in WTD-Fed L-FoxO1,3,4 Mice. Related to Figure 4**

<sup>125</sup>I-TC-/ [<sup>3</sup>H]Cet-WT-HDL was injected intravenously in WTD-fed L-FoxO1,3,4 mice and littermate controls. (A) During the subsequent 24-hr interval, blood was harvested periodically to determine the plasma decay of both tracers. <sup>125</sup>I-TC (<sup>125</sup>I) and [<sup>3</sup>H]Cet ([<sup>3</sup>H]) were analyzed, and plasma-FCRs for <sup>125</sup>I-TC and [<sup>3</sup>H]Cet were calculated. The difference in plasma-FCRs between [<sup>3</sup>H]Cet and <sup>125</sup>I-TC was calculated. 24-hrs after tracer injection, the animals were euthanized, and tissues were analyzed for both tracers. (B) Liver, (C) adrenal and (D) kidney organ-FCRs for <sup>125</sup>I-TC (<sup>125</sup>I), [<sup>3</sup>H]Cet ([<sup>3</sup>H]), and the difference in organ-FCRs between [<sup>3</sup>H]Cet and <sup>125</sup>I-TC ([<sup>3</sup>H]Cet - <sup>125</sup>I-TC) were calculated. All calculations were done as described in Materials and Methods. n = 6 control and n = 5 L-FoxO1,3,4 mice. An independent similar experiment with n=5 control mice and n=4 L-FoxO1,3,4 mice yielded qualitatively identical results as shown in the graphs. \*p < 0.05, \*\*p < 0.01, by Student's t-tests. Data are presented as mean ± SEM.

## Supplemental Figure S5

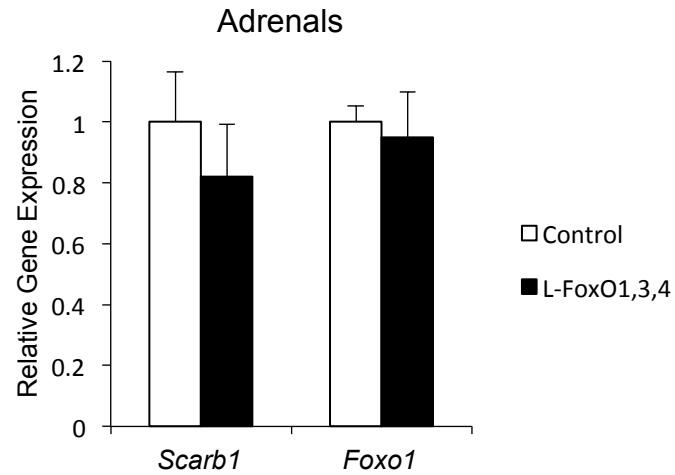

**Figure S5. Adrenal Gene Expression in Chow-Fed L-FoxO1,3,4 Mice. Related to Figure 4**

Relative adrenal *Scarb1* and *Foxo1* gene expression by qPCR in chow-fed L-FoxO1,3,4 mice (n=3) and littermate controls (n=3). Data are presented as mean  $\pm$  SEM.



## Supplemental Figure S6

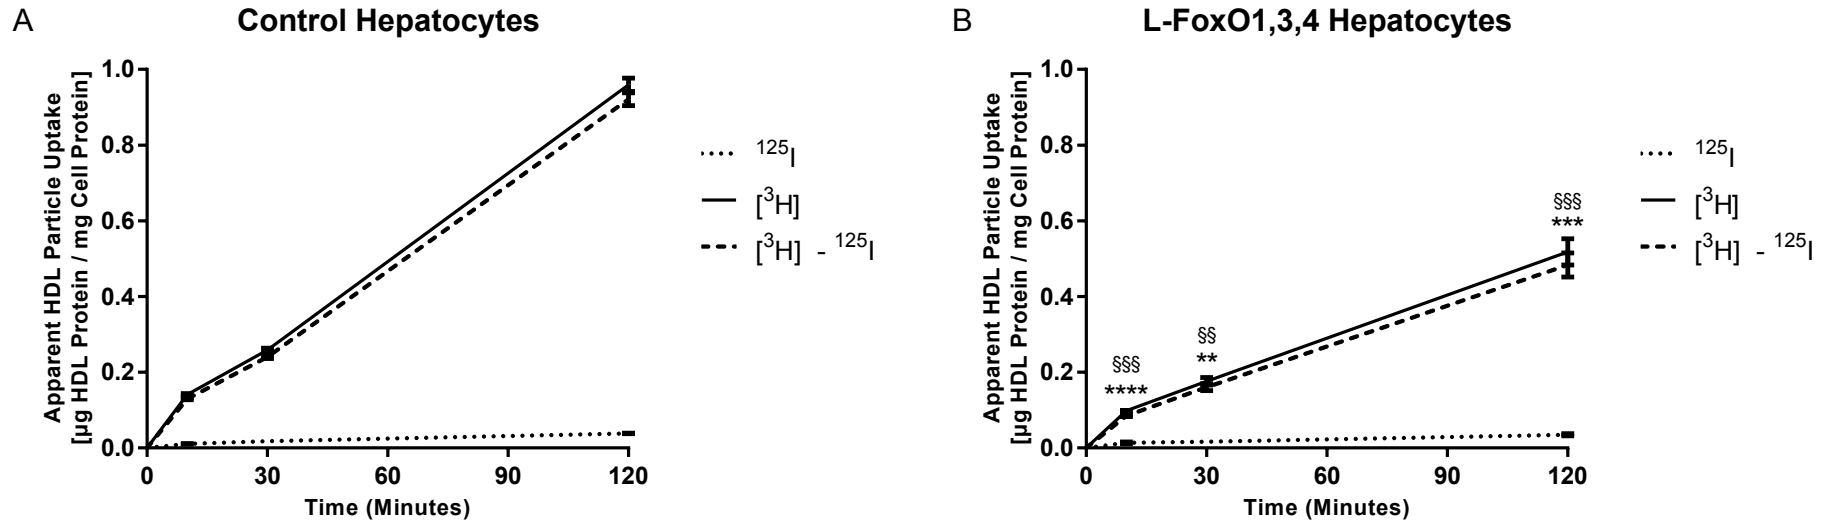

**Figure S6. Kinetics of Uptake of  $^{125}\text{I}$ -TC-/ $[^3\text{H}]$ CET-WT-HDL by Hepatocytes Isolated from Chow-Fed L-FoxO1,3,4 Mice. Related to Figure 5**

(A-B) Hepatocytes from chow-fed L-FoxO1,3,4 mice and littermate controls were incubated (37°C, 10, 30 or 120 minutes) in medium containing  $^{125}\text{I}$ -TC-/ $[^3\text{H}]$ CET-WT-HDL (20  $\mu\text{g}$  HDL protein/ml). Finally, cells were harvested, and apparent HDL particle uptake was analyzed as outlined in Materials and Methods. Values are means of (A)  $n = 3$  (control) or of (B)  $n = 3$  (L-FoxO1,3,4) independent determinations. Shown is a typical experiment. An independent similar experiment yielded qualitatively identical results. §§  $p < 0.01$ , §§§  $p < 0.001$  comparing  $[^3\text{H}]$ CET between L-FoxO1,3,4 and control hepatocytes; \*\*  $p < 0.01$ , \*\*\*  $p < 0.001$ , \*\*\*\*  $p < 0.0001$  comparing  $[^3\text{H}]$ CET -  $^{125}\text{I}$ -TC between L-FoxO1,3,4 and control hepatocytes by Student's t-tests. Data are presented as mean  $\pm$  SEM. Where no error bars are visible, the error was smaller than the symbol.

## Supplemental Figure S7

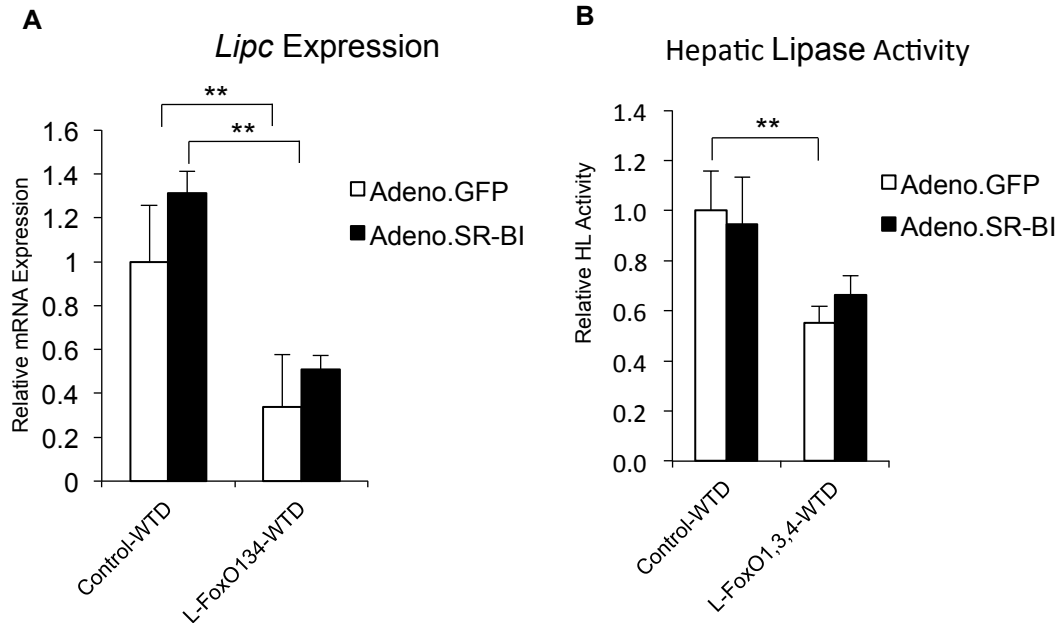

**Figure S7. Effect of SR-BI Adenovirus on HL in WTD-fed L-FoxO1,3,4 Mice. Related to Figure 6** (A) Relative hepatic *Lipc* expression by qPCR in WTD-fed L-FoxO1,3,4 mice and littermate controls transduced with Adeno.SR-BI or control virus (Adeno.GFP). (n=3-4). \*\*p<0.01 by two-way ANOVA. (B) Relative Plasma hepatic lipase activity in same mice as (A). \*\*p<0.01 by two-way ANOVA.

## Supplemental Figure S8

A

| Gene Name     | Motifs within gene sequence | Motifs from transcription start site to 5kb upstream | Motifs from 5kb-20kb upstream | Motifs from 20kb-50kb upstream | Total Motifs from end of gene to 50kb upstream |
|---------------|-----------------------------|------------------------------------------------------|-------------------------------|--------------------------------|------------------------------------------------|
| <i>Scarb1</i> | 59                          | 4                                                    | 16                            | 31                             | =110                                           |
| <i>Lipc</i>   | 174                         | 7                                                    | 14                            | 42                             | =237                                           |

B *Scarb1*

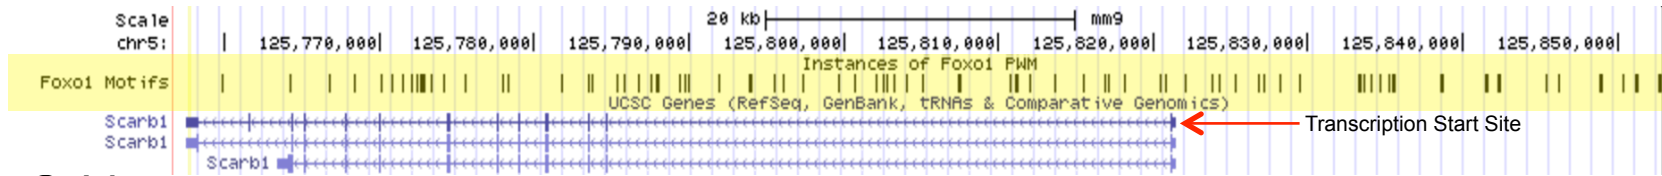

C *Lipc*

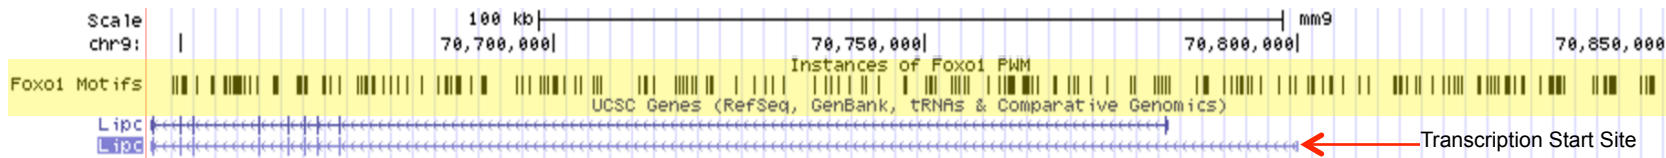

**Figure S8. Potential FoxO Binding Site Analysis of *Scarb1* and *Lipc* Using HOMER Motif Discovery Algorithm.**

(A) Summary of potential FoxO binding motifs near *Scarb1* and *Lipc*. The entire sequences for mouse *Scarb1* and *Lipc*, along with 50kb of sequence upstream of their respective transcription start sites were taken from the UCSC Genome Browser (<https://genome.ucsc.edu>). The sequences were analyzed by the HOMER algorithm software, which provided the coordinates of all the potential FoxO binding motifs within the selected regions. Values are grouped by motifs within the gene sequence, motifs from the transcription start site to 5kb upstream of start site, 5kb-20kb upstream of start site, 20kb-50kb upstream of start site, and total number of motifs.

(B-C) Schematics from the UCSC Genome Browser highlighting positions of all motifs in selected region for (B) *Scarb1* and (C) *Lipc*. Highlighted in yellow are the relative coordinates of all potential FoxO binding motifs found through HOMER. Each motif is represented as a vertical line ("|"). Transcription start sites are indicated by the red arrow (both genes are transcribed in the reverse direction).

## Supplemental Figure S9

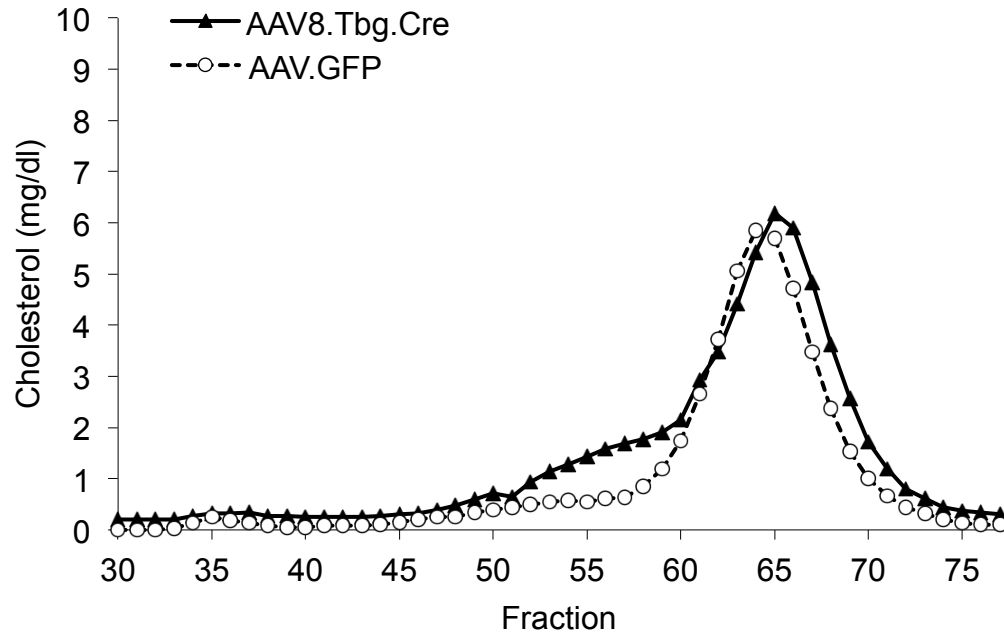

**Figure S9. Cholesterol Levels in Plasma Fractionated by FPLC in Chow-fed Hepatic FoxO Floxed Mice Transduced with Liver Specific Adeno-Associated Virus Expressing Cre. Related to Figure 7**  
Plasma was collected 2 weeks after virus transduction and fractionated by FPLC in chow-fed, adult control mice containing all three FoxO alleles floxed (*Foxo1<sup>flox/flox</sup>*, *Foxo3<sup>flox/flox</sup>*, and *Foxo4<sup>flox/Y</sup>*), and transduced with liver specific adeno-associated virus expressing either Cre (AAV8.Tbg.Cre) or control virus (AAV.GFP).

## Supplemental Figure S10

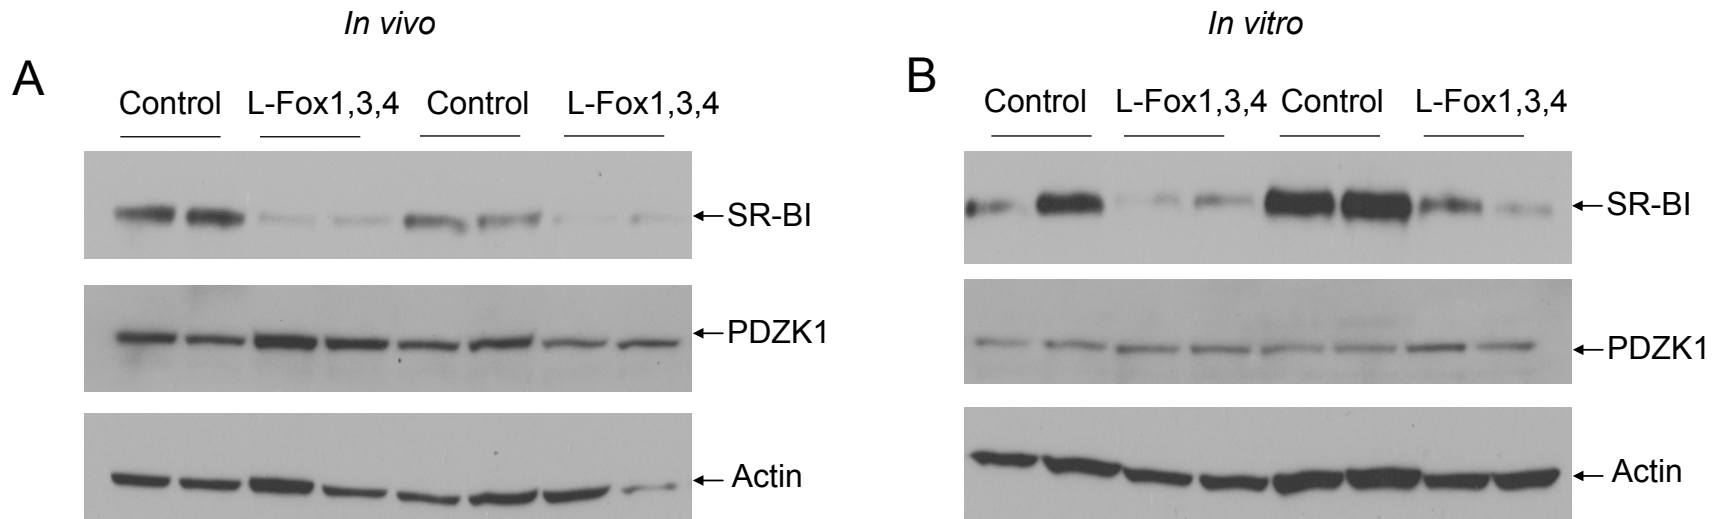

**Figure S10. Western Blot of Liver PDZK1 from WTD-Fed L-FoxO1,3,4 Mice and Hepatocytes Isolated from L-FoxO1,3,4 mice. Related to Figure 7**

(A-B) Representative western blot of hepatic PDZK1 expression from (A) WTD-fed L-FoxO1,3,4 mice and littermate controls *in vivo*, or (B) hepatocytes isolated from chow-fed L-FoxO1,3,4 mice and littermate controls *in vitro*. PDZK1 antibody was commercially purchased from Novus (Novus – NB400-149).
